# Supplementary material for: Enantioselective Protonation of Radical Anion Intermediates in Photoallylation and Photoreduction Reactions of 3,3-Diaryl-1,1-dicyano-2-methylprop-1-ene with Allyltrimethylsilane
Source: MDPI journal article supplement (doi:10.3390/molecules24142677), 2019-07-23
Supplement: s1 [file s1]

Supporting Information for

Enantioselective Protonation of Radical Anion Intermediates in Photoallylation and Photoreduction Reactions of 3,3-Diaryl-1,1-dicyano-2-methylprop-1-ene with Allyltrimethylsilane

Hajime Maeda \*, Masayuki Iida, Daisuke Ogawa and Kazuhiko Mizuno \*

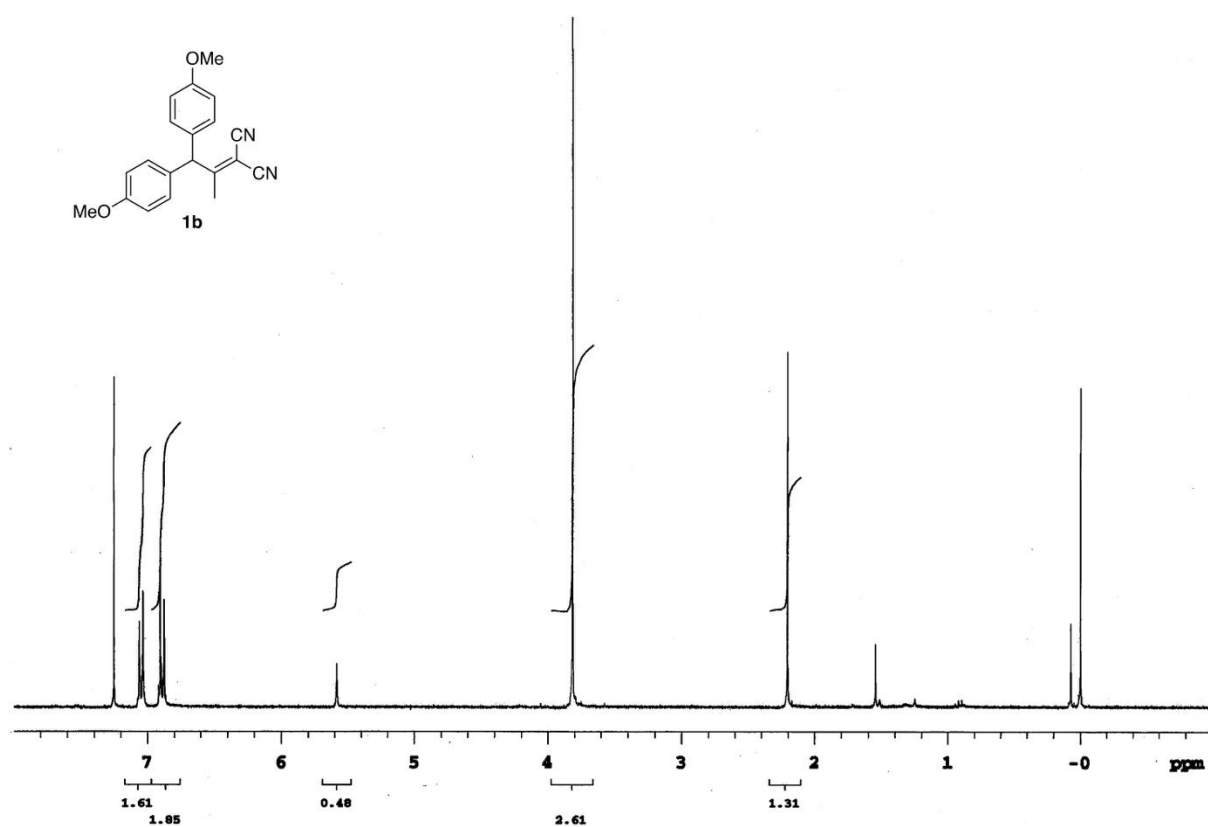

Figure S1. 300 MHz  $^1\text{H}$  NMR spectrum of **1b** in  $\text{CDCl}_3$ .

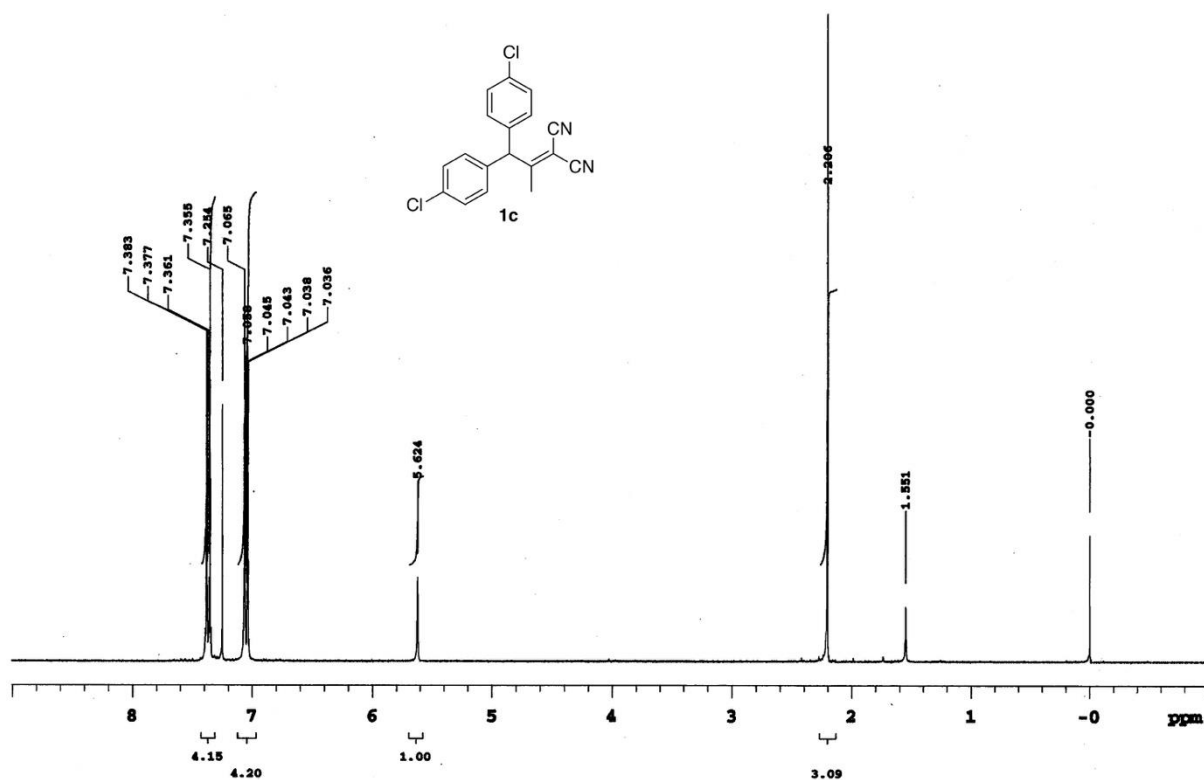

Figure S2. 300 MHz <sup>1</sup>H NMR spectrum of 1c in CDCl<sub>3</sub>.

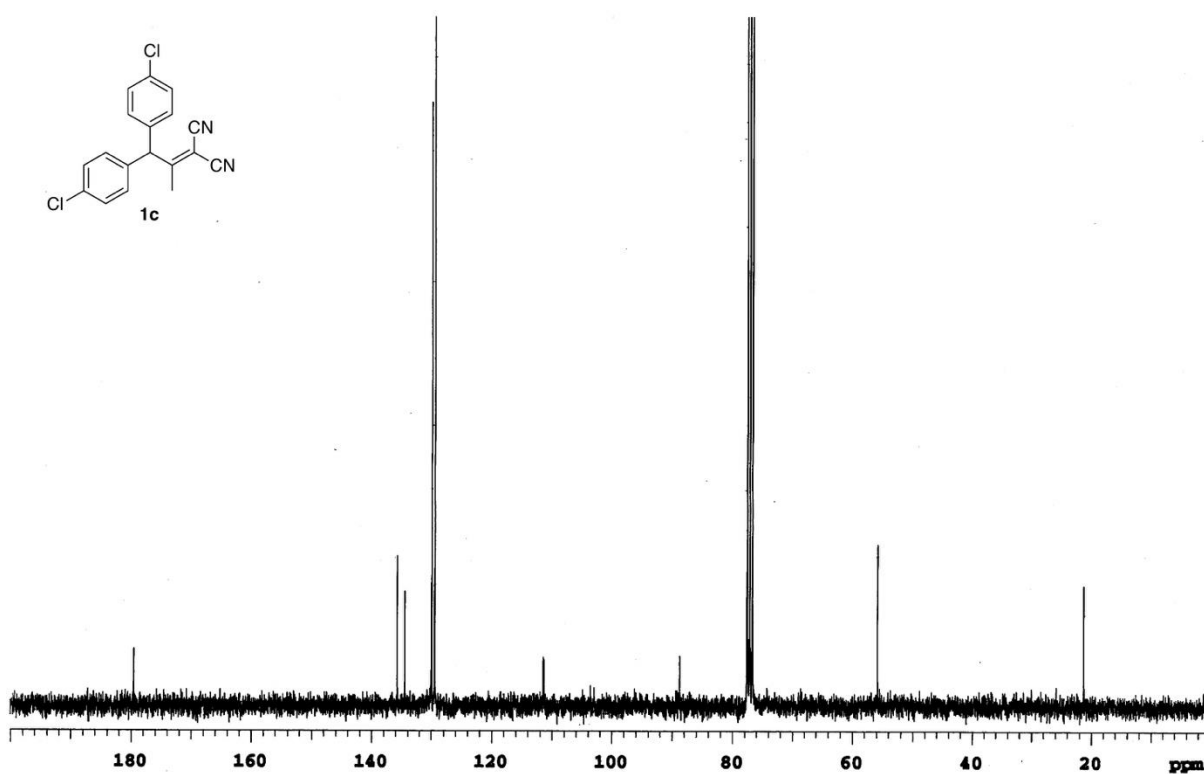

Figure S3. 75 MHz <sup>13</sup>C NMR spectrum of 1c in CDCl<sub>3</sub>.

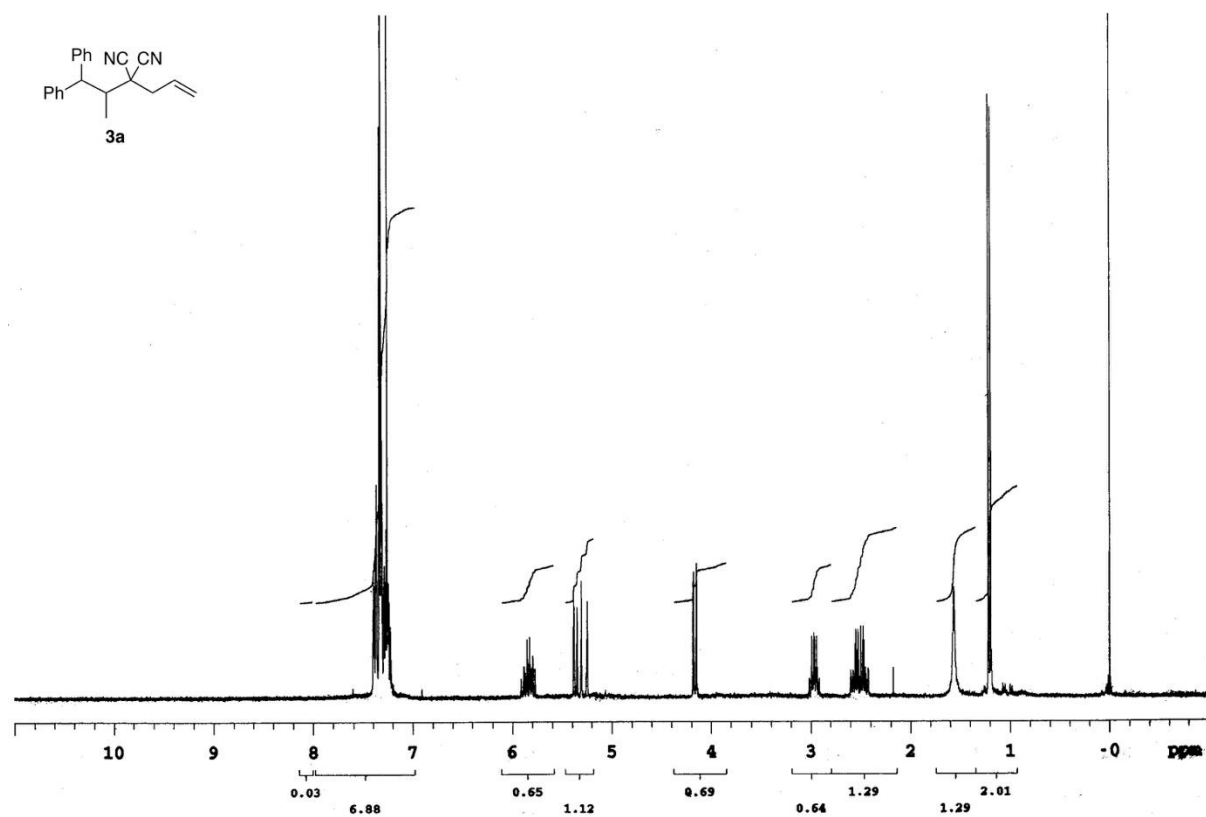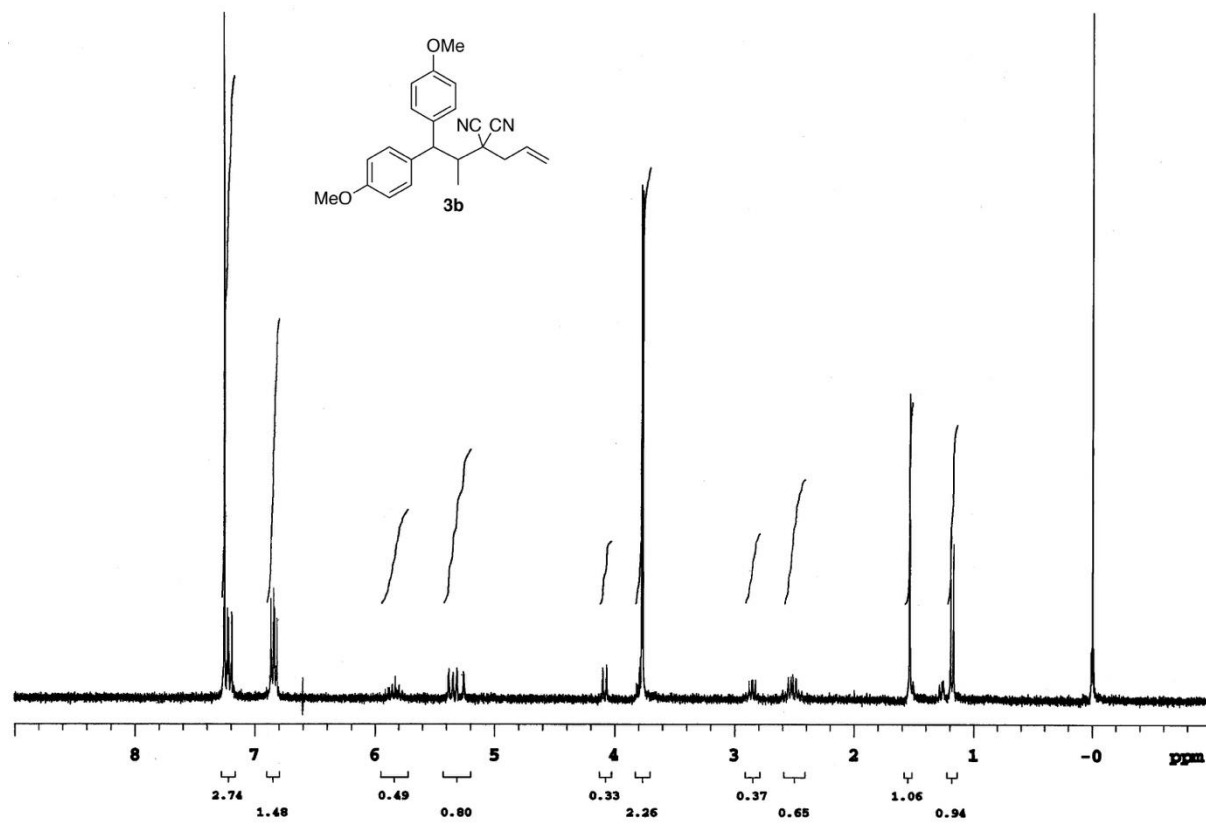

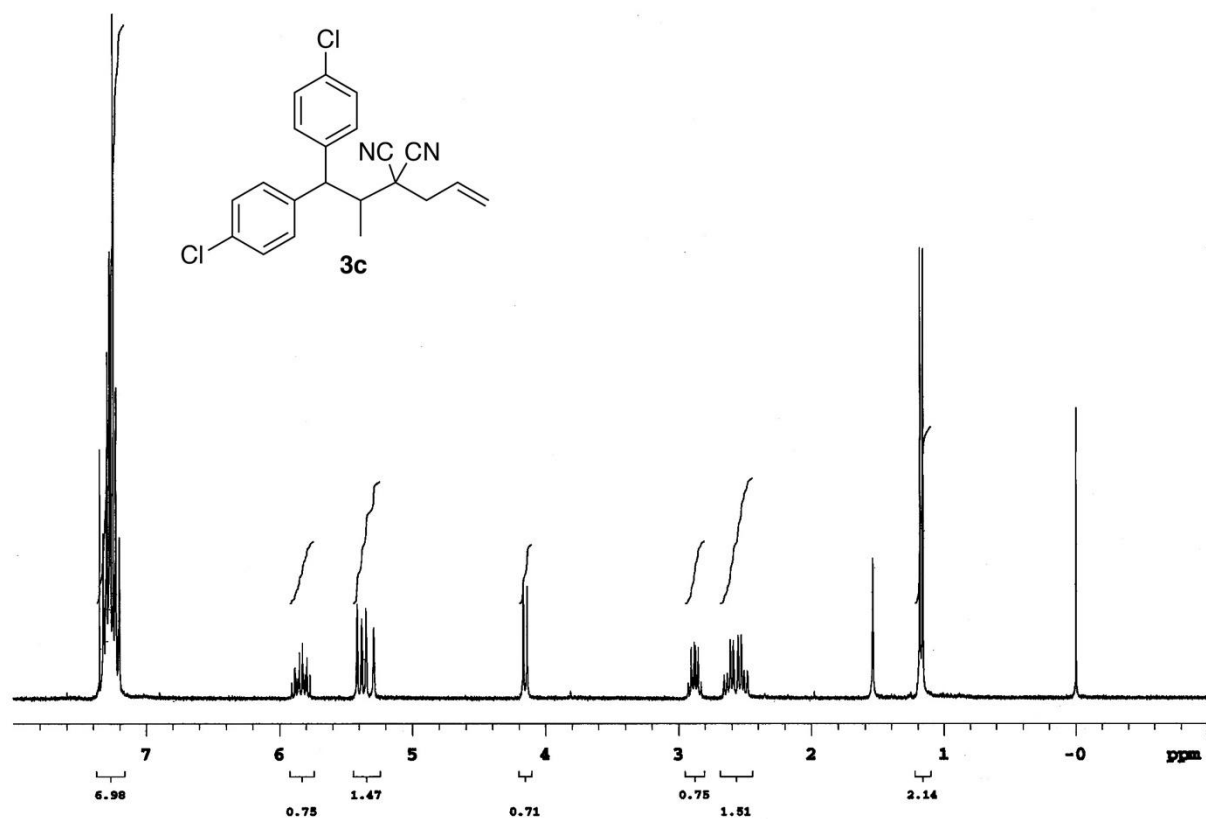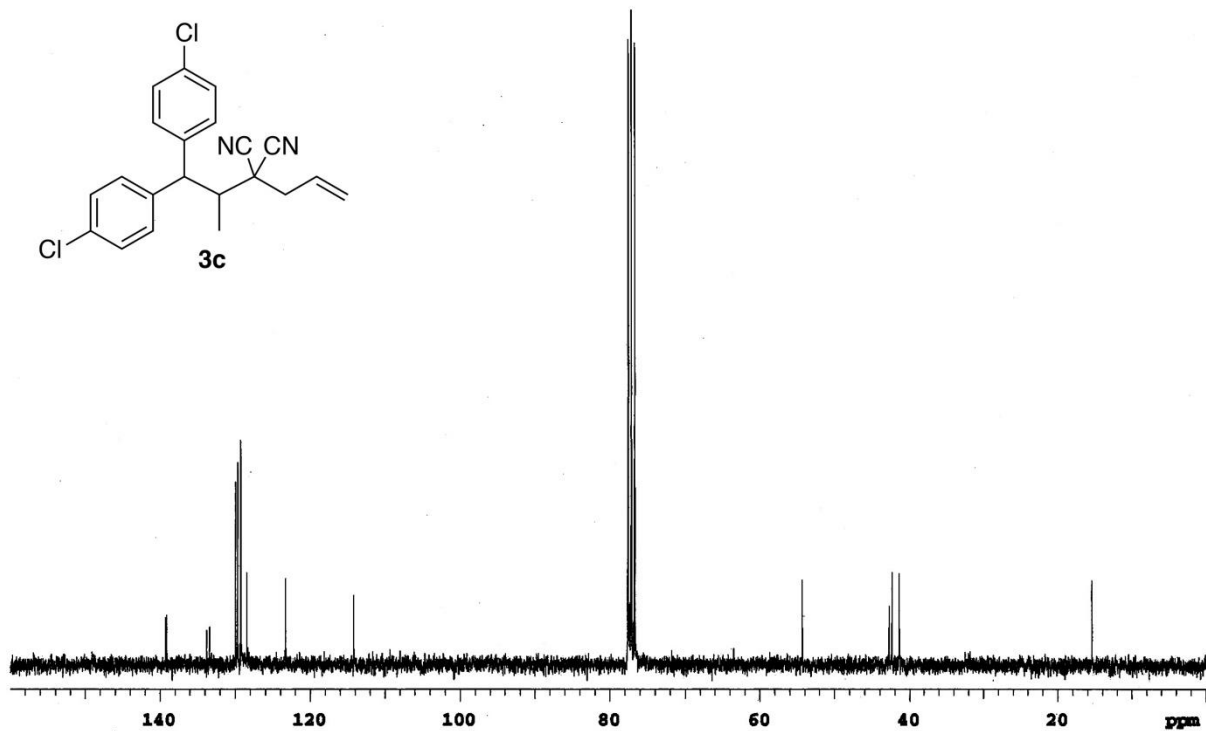

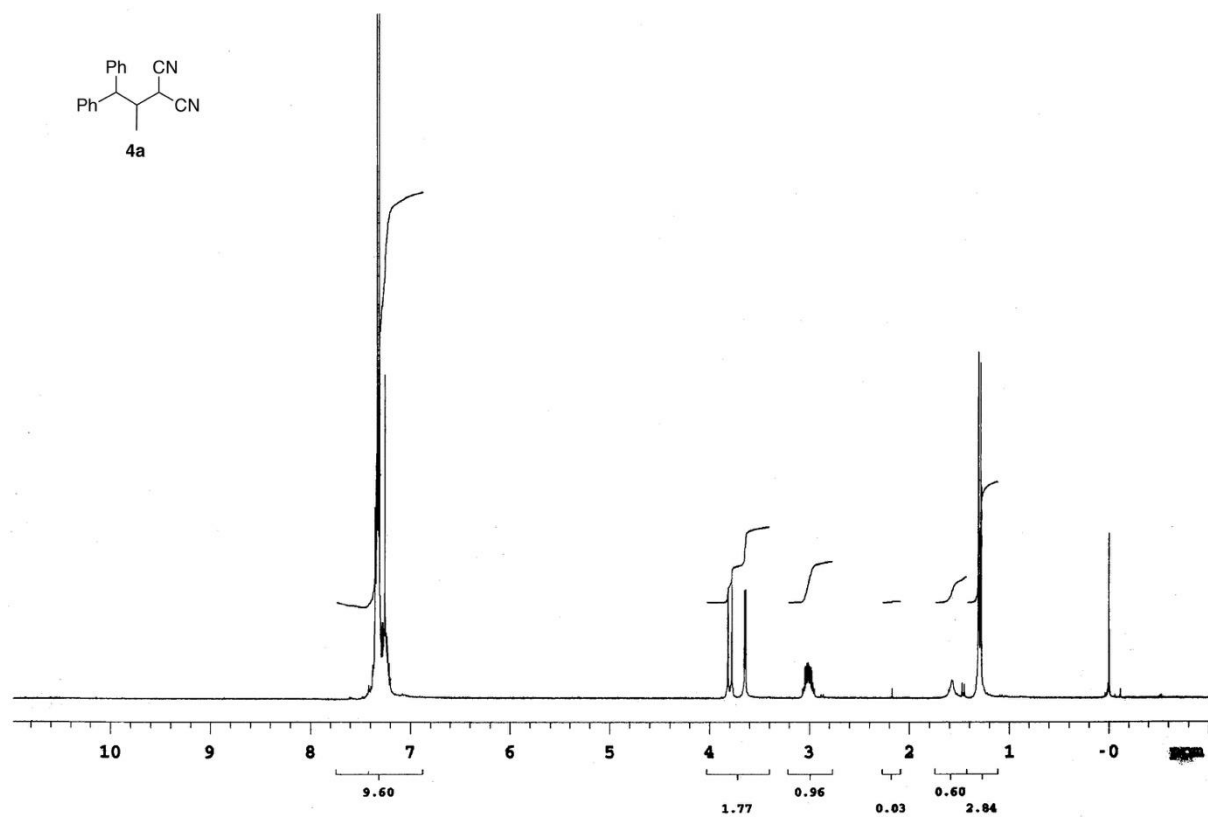

Figure S8. 300 MHz  $^1\text{H}$  NMR spectrum of 4a in  $\text{CDCl}_3$ .

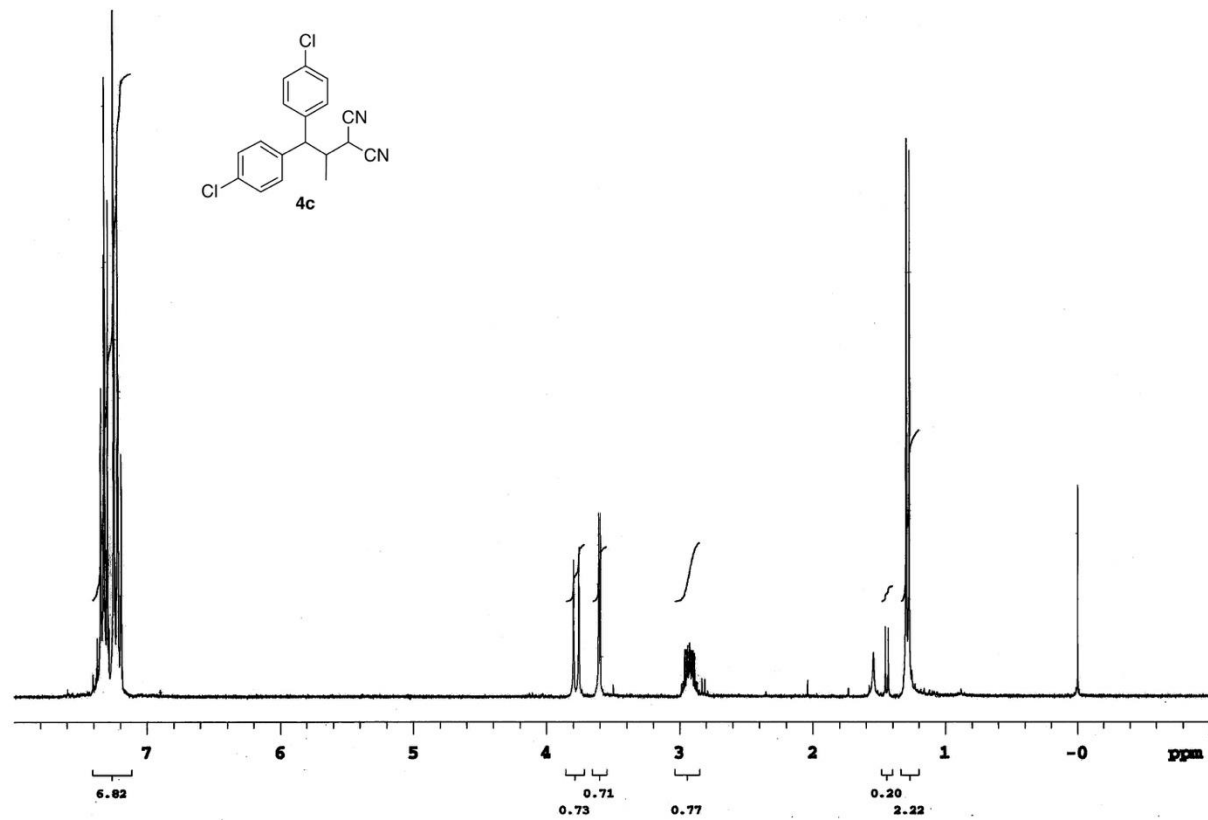

Figure S9. 300 MHz  $^1\text{H}$  NMR spectrum of 4c in  $\text{CDCl}_3$ .
